# Supplementary material for: Optic Nerve Head Development in Healthy Infants and Children Using Handheld Spectral-Domain Optical Coherence Tomography
Source: PubMed Central journal article supplement (PMC5036922; doi:10.1016/j.ophtha.2016.06.057), 2016-10
Supplement: mmc1.pdf [file mmc1.pdf]

**Table 1:** Percentage of successful handheld spectral domain optical coherence tomography (HH SD-OCT) optic nerve images categorized by age group

| <b>Age</b>                     | <b>Number of participants</b> | <b>Successful optic nerve scan, n (%)</b> |
|--------------------------------|-------------------------------|-------------------------------------------|
| <b>&lt;1 week</b>              | 30                            | 20 (67)                                   |
| <b>&gt;1 week – 2.9 months</b> | 34                            | 21 (62)                                   |
| <b>3 – 5.9 months</b>          | 33                            | 27 (81)                                   |
| <b>6 – 8.9 months</b>          | 32                            | 23 (72)                                   |
| <b>9 – 11.9 months</b>         | 25                            | 19 (76)                                   |
| <b>12 – 17.9 months</b>        | 32                            | 17 (53)                                   |
| <b>18 – 23.9 months</b>        | 26                            | 14 (54)                                   |
| <b>2 – 2.49 years</b>          | 20                            | 12 (60)                                   |
| <b>2.5 – 2.99 years</b>        | 15                            | 10 (67)                                   |
| <b>3 – 3.99 years</b>          | 23                            | 16 (70)                                   |
| <b>4 – 4.99 years</b>          | 22                            | 15 (69)                                   |
| <b>5 – 6.99 years</b>          | 39                            | 34 (87)                                   |
| <b>7 – 13 years</b>            | 21                            | 21 (100)                                  |
